# Supplementary material for: Nanoparticles from the decomposition of the complex [InN3(CH2CH2CH2NMe2)2]
Source: Royal Society of Chemistry journal article supplement (doi:10.1039/b404767b), 2004-01-01
Supplement: b404767b.doc [file b404767b.doc]

Nanoparticles from the decomposition of the stabilised indium azido complex, [InN3(CH2CH2CH2NMe2)2]

Paul S. Schofield,a Wuzong Zhou,a Phillip Wood,b Ifor D.W. Samuelb and David J. Cole-Hamiltona*

a *School of Chemistry, University of St. Andrews, St. Andrews, Fife, KY16 9ST, Fax: 44-1334-463808; Tel 44-1334-463805; e-mail: djc@st-and.ac.uk*

*b Organic Semiconductor Centre, School of Physics and Astronomy, University of St. Andrews, St. Andrews, Fife, KY16 9SS*

# Supplementary Information

**
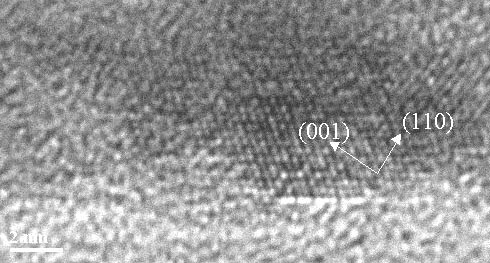
**

Figure 1. HRTEM image from Sample **A** showing a cubic phase when viewed down the [110] zone axis.

**
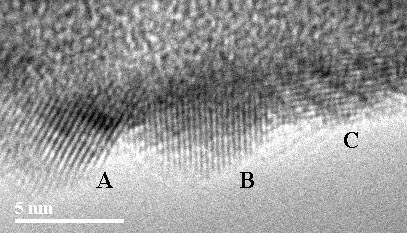
**

Figure 2. HRTEM image from Sample **A** showing three nanoparticles. The fringes in particle A has a d-spacing of 0.296 nm, corresponding to the (111) plane of the cubic phase. The d-spacing observed from particle B is about 0.255 nm, corresponding to the (200) planes of the cubic phase. A superlattice is seen in particle C.

**
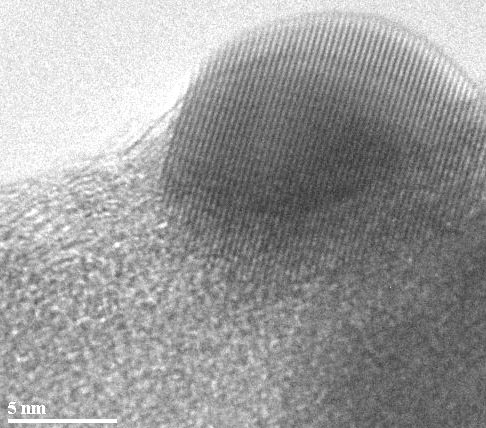
**

Figure 3. HRTEM image from Sample **A** showing a solidified droplet of In metal. The d-spacing is measured to be 0.27 nm.

**
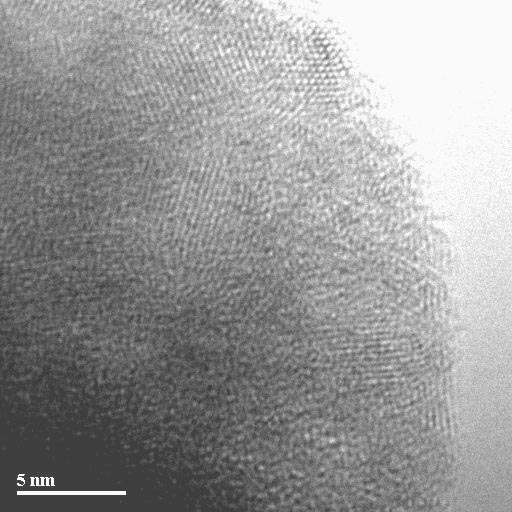
**

Figure 4. HRTEM image from Sample **B** showing many InN nanoparticles. The top particle shows 2D lattice image with the view direction of [110] of the cubic phase. The d-spacings from all other particles with 1D fringes are measured to be in a range from 0.293 to 0.298 nm, corresponding to the (111) planes.

**
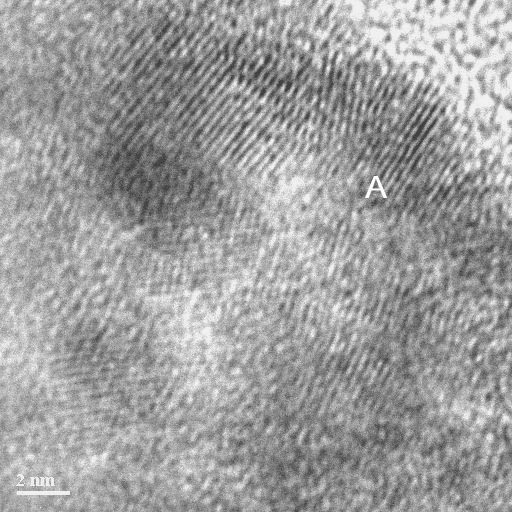
**

Figure 5. HRTEM image from Sample **B** showing many InN nanoparticles. All the observed fringes are the (111) planes of the cubic phase except particle A, which shows (200) fringes.

**
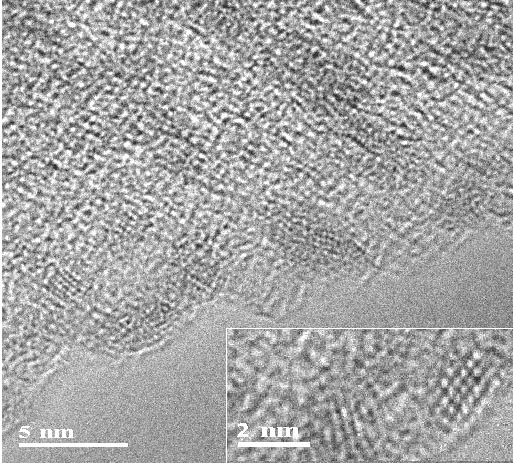
**

Figure 6. HRTEM image from Sample **C** showing many InN nanoparticles about 2 nm in size. The inset shows enlarged typical image of such particles. The right particle is on the [110] projection. However, lattice distortion is obvious.


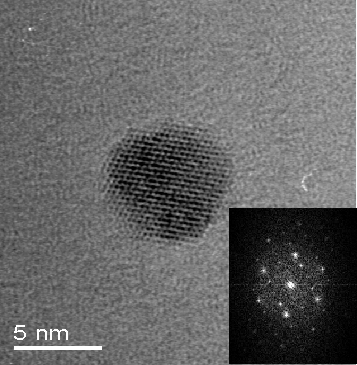


Figure 7. HRTEM image and electron diffraction pattern of a nanoparticle of In2O3 courtesy of Dr. B. N. Chaudret, Laboratoire de Chimie de Coordination, CNRS, Toulouse. Note the extra spots in the Ed pattern and the superlattice making each repeat unit consist of 4 [440] planes.This arises from the bcc structure


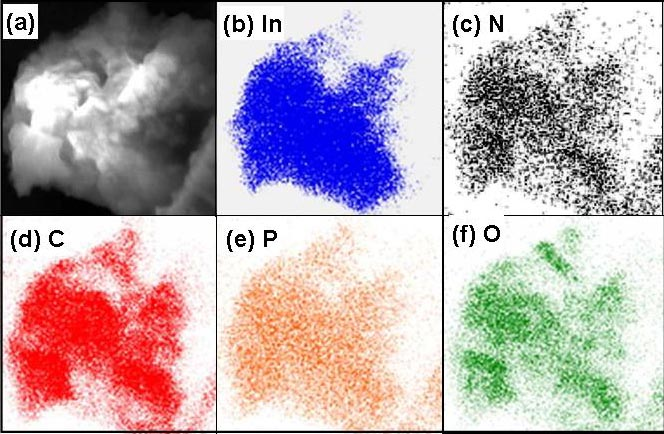


Figure 8. EDX elemental mapping from Sample B. The contrast on the image from N has been increased for clarity
